# Supplementary material for: Participatory and Transdisciplinary Studies of Brucella Infection in Humans and Animals in Yunnan Province, China—Lessons Learned
Source: MDPI journal article supplement (doi:10.3390/tropicalmed6030134), 2021-07-15
Supplement: s1 [file s1]

## On-farm/household, questionnaire

Applied to: goat farms & cooperative dairy herds (buffalo and cattle)

### Personal questionnaire

Questionnaire Numbers: Serum/Milk Collection Numbers:

Surveyor Name:

Survey Date                      Year                      Month                      Day  
Survey Site                      County                      Townships                      Village  
Surveyor

Whether By respondents I answer the questionnaire or not (    ) ①Yes ②No

### 1. General Personal Data

- Name of respondent: (                      )
- Respondent (    ): ① owner ② manager ③ worker ④ family member
- Gender (    ) ① Male ② Female
- Age (    )Years old
- Nationality (    ) ① Han ② Yi ③ Dai ④ Others (specify:                      )
- Educational level (    )  
① Primary ② middle ③ high school ④ university/collage  
⑤ other (specify:                      )
- How long in business (    ) years
- Number of family members: (    ) man, (    ) woman (    ) children(<16)  
How many of them involved in livestock business: (    ), man (    ) woman
- No of hired workers currently involved in livestock business:  
(    )man, (    ) woman

## 2. Production data/socio economic

- Animal species/breed, numbers ( )

| Species | Target purpose | Total No | Breed 1 (specify) | Breed 2 (specify) |
|---------|----------------|----------|-------------------|-------------------|
| Cattle  |                |          |                   |                   |
| Goats   |                |          |                   |                   |
| Buffalo |                |          |                   |                   |
| Pigs    |                |          |                   |                   |
| Others  |                |          |                   |                   |

- Farm type ( )

① cooperative    ② small holder    ③ other (specify: )

- Production figures

- How many calves/lambs born ( ) per year
- Milk yield at average ( ) per day
- How many bulls/goats for sell ( ) per year

- Entry of animals (last 12 months)

| Species | Total | Same village | Same District | Other (specify) |
|---------|-------|--------------|---------------|-----------------|
|         |       |              |               |                 |
|         |       |              |               |                 |
|         |       |              |               |                 |

If it is from the own reproduction, the township and village are ( )

- Exit of animals (last 12 months) (township)

| Species | Total | Same village | Same District | Other (specify) |
|---------|-------|--------------|---------------|-----------------|
|         |       |              |               |                 |
|         |       |              |               |                 |
|         |       |              |               |                 |

- What do you do with the milk ( )

① own consumption ② sell ③ make cheese (own processing) ④ other

- Where is the produced milk supplied to? ( )

① same village ② same district ③ other district

- Do you supply milk to a dairy company or milk vendor: ( ) ① yes ② no

If yes, provide address: ( )

- Land use ( ) ①own ②rented ③purchased

- Feeding with ( )

①crop ②corn ③grass and silage ④other(specify: )

- Income

- Total income (Yuan) in last 12 months

- Income (Yuan) by category in last 12 months

domestic livestock: ( ) from crops, ( ) from both animals, and crops( ) from others (specify: )

- Income trend 2010 and 2011: ( ) ① upwards ② downwards

If change observed, what is the most important reason: ( )

### 3. Animal health

- List observed animal diseases or symptoms in the last 12 months

| Species | No of animals in stock | No of animals infected | No of Death | Disease/symptoms |
|---------|------------------------|------------------------|-------------|------------------|
|         |                        |                        |             |                  |
|         |                        |                        |             |                  |
|         |                        |                        |             |                  |
|         |                        |                        |             |                  |
|         |                        |                        |             |                  |

- Ranking of the first 3 most important

| Disease/symptoms | Loss from the disease | Action to be undertaken | Rank by importance |
|------------------|-----------------------|-------------------------|--------------------|
|                  |                       |                         |                    |
|                  |                       |                         |                    |
|                  |                       |                         |                    |
|                  |                       |                         |                    |
|                  |                       |                         |                    |

### 4. Disease prevention

- Access to Vet Services

What do you do when you find a sick animal? By ( ) ① company vet  
② local vet ③ treat on my own ④ others (specify: )

- Vaccination

| Type of vaccine | From where | When applied | By whom | Performance |
|-----------------|------------|--------------|---------|-------------|
|                 |            |              |         |             |
|                 |            |              |         |             |
|                 |            |              |         |             |
|                 |            |              |         |             |
|                 |            |              |         |             |

- Does a farm gate bio-security measure exist? (    ) ① yes ② no

If not, why not (    ) ① not important ② not comfortable ③ too expensive

- (4) How often is the measure of animal house cleaning performed?

Please specify: (    )

- Is there a disinfection program performed in farm? (    ) ① yes ② no

If yes, please specify: (    )

- If there is a sick animal, what do you do with it? (    ) ① Destroy ② keep it in separation ③ keep it without separation ④ sell ⑤ other  
(specify:    )

- If you have a news that a disease is occurring in your township or village, what do you do with your animal farm? Please specify: (    )

- What do you do with a dead animal body? (    )

① sell for slaughter ② meat for family consumption ③ deep bury with disinfection ④ others  
(specify    )

- Quarantine for newly-introduced animals,

If you introduce a new animal, do you have a quarantine measure? (    )  
① yes ② no

If yes, please specify how: (    ) and why: (    )

① avoid disease ② follow regulations ③ advice from vet ④ other

If not, why not: (    )

① not important ② not comfortable ③ too expensive ④ other

- If a newly-introduced animal is sick, what do you do with it? ( )  
 ① keep it in separation ② keep it without separation ③ give it back to the former owner ④ report to officers ⑤ other
- When you have a plan to introduce animals, what do you most concern?  
 ① breed ② price ③ disease ④ other
- When you introduce animals, do you ask for an animal health certificate?  
 ① yes ② no
- If yes, which disease are of your concern  
 If no, why not? Please specify: ( )
- Do you share pasture (communal grazing) or equipment (e.g. for milking) with other farmers/villagers ① yes ② no

## 5. Reproductive disorders

- Survey of abortion history (over last 12 months)

| Type                  | No | When (month) | Status of pregnancy |     |      | Comments |
|-----------------------|----|--------------|---------------------|-----|------|----------|
|                       |    |              | early               | mid | late |          |
| Heifer                |    |              |                     |     |      |          |
| Cow                   |    |              |                     |     |      |          |
| Goat (1st pregnancy)  |    |              |                     |     |      |          |
| Goat (>2nd pregnancy) |    |              |                     |     |      |          |

- How does the fetus look like: ( )  
 ① fresh ② leathery ③ rotten ④ unknown
- What are the possible cause of the abortion: ( )  
 ① trauma ② new animals introduced ③ other (specify: )

④ unknown

- What do you do with the aborted materials? ( )  
① deep burying ② feed to dog ③ others (specify: )

④ unknown

- If ever, did you use gloves when you handled the abortion materials/fetus?  
( ) ① yes ② no

if no, why not? ( ) ① not comfortable ② too expensive ③ not needed

- How do handle the problem of observed abortion in animals? ( )

① inform vet ② handle on my own

- What they do with the female with abortion? ( )

① still keep it ② inseminate it again ③ slaughter for meat ④ sell it

⑤ others (specify: )

- What do you do with the milk from a cow with an abortion history? ( )

① still milking ② milking, but not use for human consumption ③ discharge

④ others(specify: )

## 6. Infertile cows/goats/buffalo (adjust by species)

- Herd structure (add goats)

| Total number of cows/goats | Calves | Heifers | Bulls |
|----------------------------|--------|---------|-------|
|                            |        |         |       |

- Herd fertility (cows)(adjust by species)

| Total no. cows/goats | Pregnant | Not pregnant for 12 months | Not pregnant for 24 months |
|----------------------|----------|----------------------------|----------------------------|
|                      |          |                            |                            |

- What do you do with cows which do not give birth in the last 2 years?(adjust for goats)

①still keep                      ②sell                      ③other

- Herd fertility (bull)

What do you use for breeding purpose?

① bull (own)                      ②bull (neighbor)                      ③AI

④other (specify:                      )

- Bull not successfully breeding performance (what they do with such a bull/goat): (specify:                      )

## 7. Zoonoses

- Do you know any disease which can be transmitted from animals to human?

(              ) ① yes    ② no

If yes, please kindly fill the table below

| Serial | Name of diseases | Symptoms | Mode of transmission |
|--------|------------------|----------|----------------------|
| 1      |                  |          |                      |
| 2      |                  |          |                      |
| 3      |                  |          |                      |
| 4      |                  |          |                      |
| 5      |                  |          |                      |

- Do you have any specific knowledge for Toxoplasmosis and Brucellosis?

(              ) ① yes    ② no



if yes, please kindly fill the table below

| Name of diseases | Symptoms | Mode of transmission |
|------------------|----------|----------------------|
| Brucellosis      |          |                      |
| Toxo             |          |                      |

- What are the potential risk factors for transmission of Brucellosis? ( )  
 ① contact to sick animal ② drink milk ③ eat meat ④ handle either milk or meat ⑤ keep pet animals
- What are the potential risk factors for transmission of Toxoplasmosis?  
 ( ) ① contact to sick animal ② drink milk ③ eat meat ④ handle either milk or meat ⑤ keep pet animals
- What are the key factors when handling milk for self consumption? ( )  
 ① drink fresh milk ② drink less ③ cook well ④ keep in icebox ⑤ keep in room temperature

## 8. Zoonoses Human(Case survey)

- What symptom do you endurance?  
 ○ fever ( ) ①yes ②no  
 If yes, fever lasted for ( ) days, the temperature was ( )°C  
 ○ sweating ( ) ①yes ②no  
 ○ joint & muscular pain ( ) ①yes ②no  
 ○ testes inflammation ( ) ①yes ②no
- Livestock contact history (tick the relevant one)  
 ○ pasture cattle or goats ( )

- butcher (      )
  - artificial insemination (      )
  - vet (      )
  - skin lamb with bare hands (      )
  - other (specify:                      )
- Possible transmitted route (tick the relevant one)
    - occupational contact with infected animals (      )
    - ingesting raw milk (      )
    - ingesting cheese (      )
    - contact with *Brucellosis* patients (      )

## 9. Environment

- Transportation:(      Km) from main roads, (      Km) from village, (      Km) from the nearest farm.
- Water supply from(      ) ① well ② tap water ③ a shared river ④ rainwater
- Does the office, production area and workers living area separated? (      ) ① yes ② no
- Does there is a waste-processing areas in your farm? (      )
  - ① yes ② no
- How do you deal with the manure? (      )
  - ① sell to organic fertilizer company ② self use (manure to own land) ③ discard ④ other (specify:                      )
